# Supplementary material for: Functional Dyspepsia, Peptic Ulcer, and Helicobacter pylori Infection in a Rural Community of South Asia: An Endoscopy-Assisted Household Survey
Source: PubMed Central journal article supplement (PMC8052092; doi:10.14309/ctg.0000000000000334), 2021-04-16
Supplement: ct9-12-e00334-s001.pdf [file ct9-12-e00334-s001.pdf]

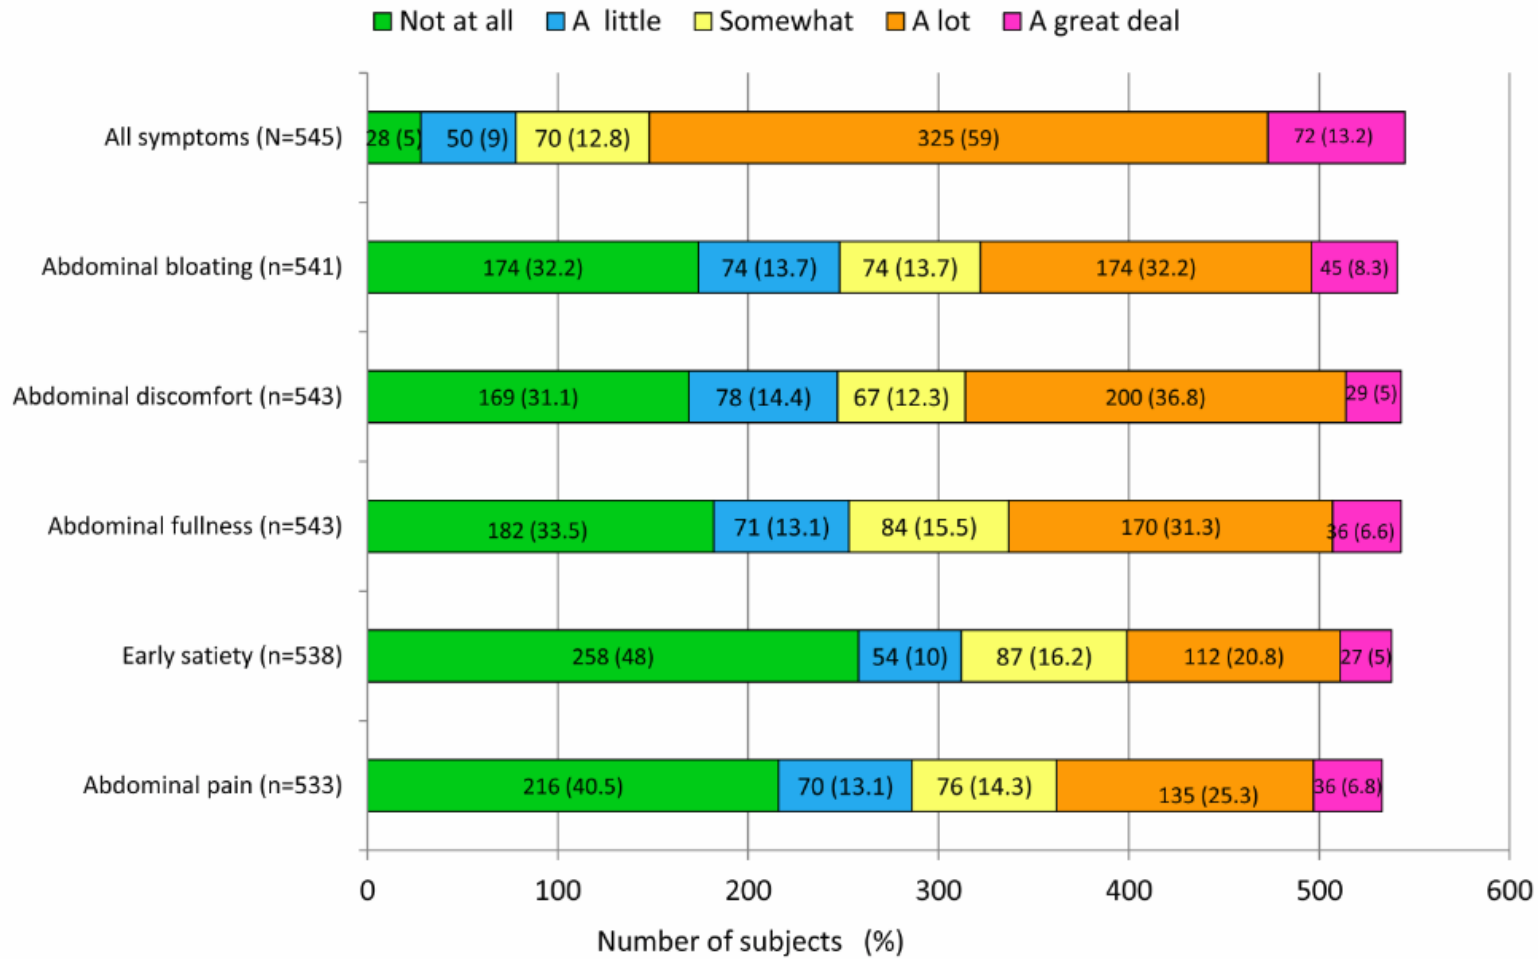

**Figure Supplemental Digital Content 2:** Symptoms affecting the quality of life (QoL) among the subjects with uninvestigated dyspepsia.
